# Supplementary material for: A novel two-zone sequential optimization model for pyro-oxidation and reduction reactions in a downdraft gasifier
Source: Royal Society of Chemistry journal article supplement (doi:10.1039/d3ra00667k), 2023-01-01
Supplement: d3ra00667k1.pdf [file d3ra00667k1.pdf]

### Heat loss in zone I:

The expression for heat loss is given as:

$$Q_{loss} = U_o A' (T_{wall} - T_{\infty}) \quad (1)$$

The overall heat transfer coefficient  $U_o$  is determined using the following expression:

$$U_o = 1.9468(T_{wall} - T_o)^{1/4} (2.8633\nu_o + 1)^{1/2} + 5.75 \times 10^{-8} \varepsilon_{ins} \frac{T_w^4 - T_o^4}{T_w - T_o} \quad (2)$$

The temperature ( $T_o$ ) can be determined using the energy balance equation as follows:

$$U_o (T_{wall} - T_o) = \frac{k_{ins}}{t_{ins}} (T - T_{wall}) \quad (3)$$

### Performance criteria in Taguchi optimization:

- i. Larger-the-better. (Calorific value, gasification efficiency).

$$S/N \text{ ratio} = -10 \log \left[ \frac{1}{n} \sum \frac{1}{Y_i^2} \right] \quad (4)$$

- ii. Smaller-the-better. (Pollutants and contaminants.)

$$S/N \text{ ratio} = -10 \log \left[ \frac{1}{n} \sum Y_i^2 \right] \quad (5)$$

- iii. Nominal the better

$$S/N \text{ ratio} = -10 \log [s^2] \quad (6)$$

### ANOVA

$$(SS) = n(\chi_1 - \bar{m})^2 + n(\chi_2 - \bar{m})^2 + n(\chi_3 - \bar{m})^2, \quad (7)$$

SS= sum of squares, n=number of trials

$\chi_1, \chi_2, \chi_3$  = mean of all experimental trial for first, second and third level of variables respectively,  $\bar{m}$  = mean of all SNR ratio at a time (e.g. mean of 27 experimental trial at a time)

$$SS_{\text{Total}} = \sum_{n=1}^{27} (\chi_i - \bar{m})^2 \quad (8)$$

$$SS_{\text{error}} = SS_{\text{Total}} - SS$$

$$\text{Percentage contribution} = \frac{SS \text{ of parameter}}{SS_{Total}} \times 100 \quad (9)$$

Table Orthogonal a

| A | B | C | D | E |
|---|---|---|---|---|
| 1 | 1 | 1 | 1 | 1 |
| 1 | 1 | 1 | 1 | 2 |
| 1 | 1 | 1 | 1 | 3 |
| 1 | 2 | 2 | 2 | 1 |
| 1 | 2 | 2 | 2 | 2 |
| 1 | 2 | 2 | 2 | 3 |
| 1 | 3 | 3 | 3 | 1 |
| 1 | 3 | 3 | 3 | 2 |
| 1 | 3 | 3 | 3 | 3 |
| 2 | 1 | 2 | 3 | 1 |
| 2 | 1 | 2 | 3 | 2 |
| 2 | 1 | 2 | 3 | 3 |
| 2 | 2 | 3 | 1 | 1 |
| 2 | 2 | 3 | 1 | 2 |
| 2 | 2 | 3 | 1 | 3 |
| 2 | 3 | 1 | 2 | 1 |
| 2 | 3 | 1 | 2 | 2 |
| 2 | 3 | 1 | 2 | 3 |
| 3 | 1 | 3 | 2 | 1 |
| 3 | 1 | 3 | 2 | 2 |
| 3 | 1 | 3 | 2 | 3 |
| 3 | 2 | 1 | 3 | 1 |
| 3 | 2 | 1 | 3 | 2 |
| 3 | 2 | 1 | 3 | 3 |
| 3 | 3 | 2 | 1 | 1 |
| 3 | 3 | 2 | 1 | 2 |
| 3 | 3 | 2 | 1 | 3 |
